# Supplementary material for: 25OHVitamin D Levels in a Canarian Pediatric Population with and without Type 1 Diabetes: The Role of Acidosis
Source: MDPI journal article supplement (doi:10.3390/nu15133067), 2023-07-07
Supplement: s1 [file s1]

## Supplementary materials

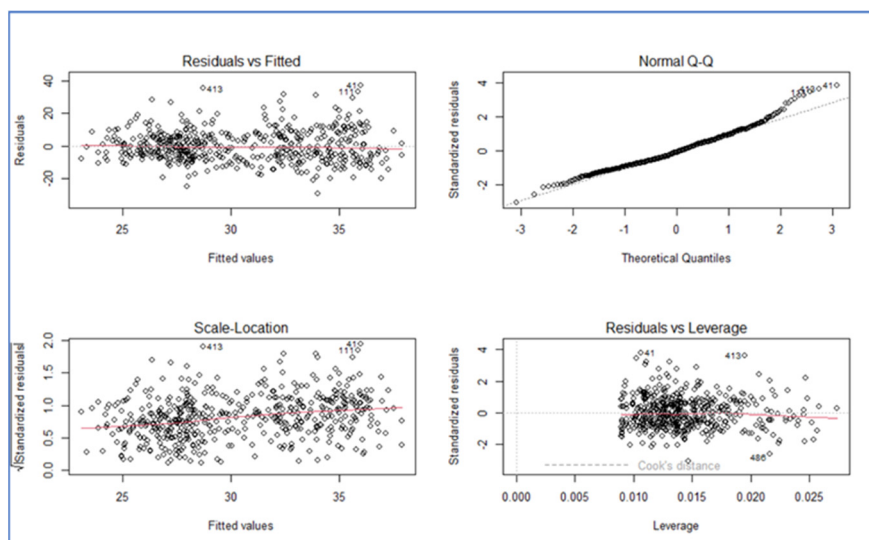

Figure S1. Goodness of fit.

| 25OHVitamin D         | Control-<br>Winter | T1D-<br>Winter | Control-<br>Spring | T1D-<br>Spring | Control-<br>Summer | T1D-<br>Summer | Control-<br>Autumn | T1D-<br>Autumn |
|-----------------------|--------------------|----------------|--------------------|----------------|--------------------|----------------|--------------------|----------------|
| N                     | 77                 | 33             | 95                 | 39             | 104                | 42             | 70                 | 32             |
| Mean                  | 27                 | 25.78          | 27.39              | 27.95          | 35.5               | 33.35          | 32.72              | 29.75          |
| Standard<br>Deviation | 7.83               | 8.87           | 6.54               | 10.79          | 12.45              | 10.85          | 10.67              | 9.46           |
| Min                   | 7.4                | 9.2            | 15.1               | 3              | 12.8               | 4.4            | 13.6               | 13.2           |
| P25                   | 20.6               | 21.4           | 22.35              | 20.85          | 26.08              | 26.13          | 24.42              | 19.88          |
| Median                | 26.6               | 24.2           | 26.1               | 27.5           | 32.6               | 32.3           | 32.55              | 31.2           |
| P75                   | 31.4               | 31.5           | 31.6               | 32.2           | 45.12              | 40.53          | 38.68              | 36.57          |
| Max                   | 54.2               | 44.8           | 49.6               | 64             | 73.1               | 57.2           | 63.9               | 49             |

Table S1. 25OHVitamin D levels per season in both groups.
